# Supplementary material
Source: PubMed Central journal article supplement (PMC4693632)
Supplement: NIHMS744902-supplement-Supporting_Information.pdf [file NIHMS744902-supplement-Supporting_Information.pdf]

**Structure of an unprecedented G-quadruplex scaffold  
in the human *c-kit* promoter**

Anh Tuân Phan<sup>1,3,\*</sup>, Vitaly Kuryavyi<sup>1,#</sup>, Sarah Burge<sup>2,4,#</sup>,  
Stephen Neidle<sup>2,\*</sup> & Dinshaw J. Patel<sup>1,\*</sup>

**Supplementary Materials**

**Table S1.** List of 2% <sup>15</sup>N-labeled samples of *c-kit87up*<sup>a</sup>.

| Name        | Sequence |            |   |            |   |          |    |            |                |           |
|-------------|----------|------------|---|------------|---|----------|----|------------|----------------|-----------|
|             | 1        |            | 2 |            | 3 |          | 4  |            |                |           |
| <i>ck2</i>  | A        | GGG        | A | GGG        | C | G        | CT | GGG        | AGGAG          | <b>GG</b> |
| <i>ck3</i>  | A        | GGG        | A | GGG        | C | G        | CT | GGG        | AGGAG          | <b>GG</b> |
| <i>ck4</i>  | A        | GGG        | A | GGG        | C | G        | CT | GGG        | AG <b>G</b> AG | GG        |
| <i>ck5</i>  | A        | GGG        | A | GGG        | C | G        | CT | GGG        | A <b>G</b> GAG | GG        |
| <i>ck6</i>  | A        | GGG        | A | GGG        | C | G        | CT | <b>GGG</b> | AGGAG          | GG        |
| <i>ck7</i>  | A        | GGG        | A | GGG        | C | G        | CT | <b>GGG</b> | AGGAG          | GG        |
| <i>ck8</i>  | A        | GGG        | A | GGG        | C | G        | CT | <b>GGG</b> | AGGAG          | GG        |
| <i>ck9</i>  | A        | GGG        | A | GGG        | C | <b>G</b> | CT | GGG        | AGGAG          | GG        |
| <i>ck10</i> | A        | GGG        | A | <b>GGG</b> | C | G        | CT | GGG        | AGGAG          | GG        |
| <i>ck11</i> | A        | GGG        | A | <b>GGG</b> | C | G        | CT | GGG        | AGGAG          | GG        |
| <i>ck12</i> | A        | GGG        | A | <b>GGG</b> | C | G        | CT | GGG        | AGGAG          | GG        |
| <i>ck13</i> | A        | <b>GGG</b> | A | GGG        | C | G        | CT | GGG        | AGGAG          | GG        |
| <i>ck14</i> | A        | <b>GGG</b> | A | GGG        | C | G        | CT | GGG        | AGGAG          | GG        |
| <i>ck15</i> | A        | <b>GGG</b> | A | GGG        | C | G        | CT | GGG        | AGGAG          | GG        |

<sup>a</sup> 2% <sup>15</sup>N-labeled residues are in boldface and labeled in red. Loop numbers are labeled in blue.

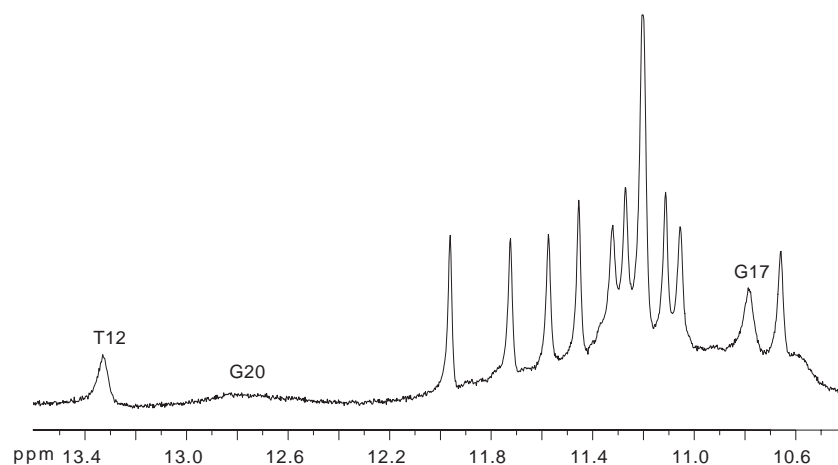

**Figure S1.** The 600 MHz imino proton spectrum of the *c-kit87up* sequence at 5 °C. Imino proton of T12, G20, and G17 are indicated. Imino proton of T12 was assigned in a natural abundance  $^{15}\text{N}$ ,  $^1\text{H}$ -HMQC spectrum. Imino proton of G17 was assigned in a  $^{15}\text{N}$ -filtered experiment on a sample that was 2%  $^{15}\text{N}$ -labeled at this position. The broad peak at 12.8 ppm was assigned to the G20 imino proton, because this peak was down-field shifted when G20 was substituted by either T or I.

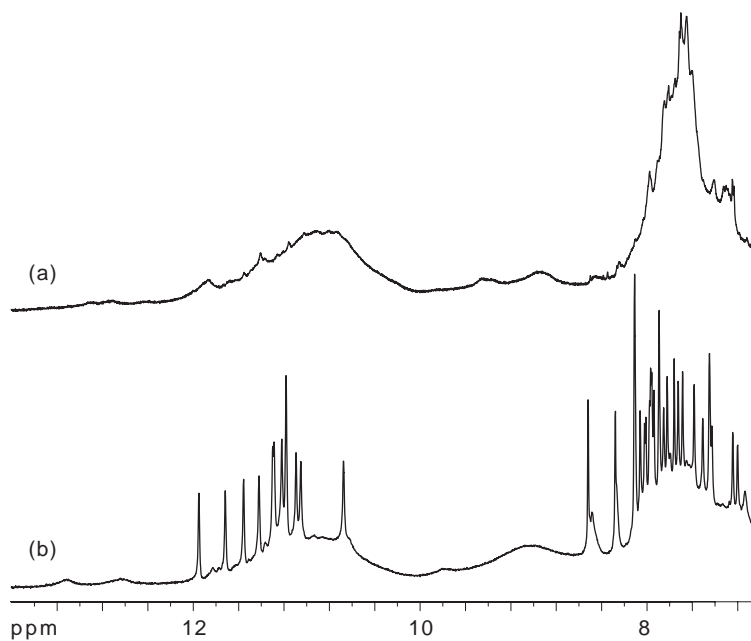

**Figure S2.** The 600 MHz proton spectra (7.0-13.6 ppm) of *c-kit87up* in (a)  $\text{Na}^+$  and (b)  $\text{K}^+$  solution at 25 °C.

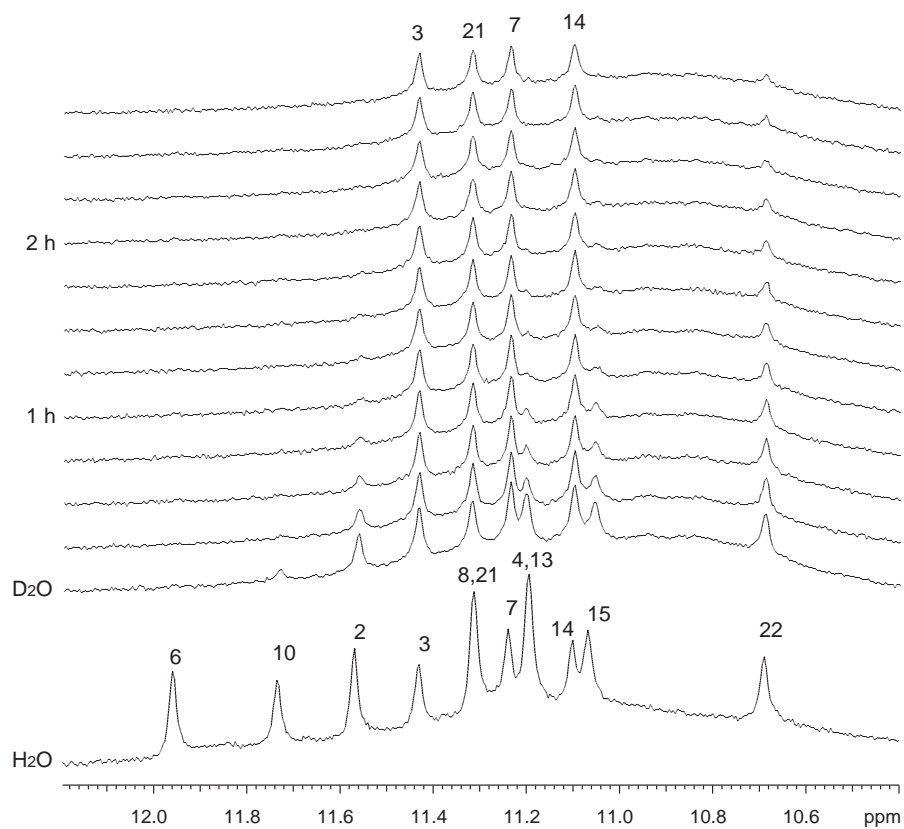

**Figure S3.** Real-time hydrogen exchange experiments for *c-kit87up*. Imino proton spectra in H<sub>2</sub>O and after different periods of time in D<sub>2</sub>O at 25 °C.
